# Supplementary material for: Genetic Variation and Gene Expression Levels of Tight Junction Genes Indicates Relationships Between PTEN as well as MAGI1 and Microscopic Colitis
Source: Springer Nature journal article supplement (doi:10.1007/s10620-017-4857-7), 2017-12-04
Supplement: MOESM1 [file 15277004]

## Sheet: Blad1
Supplementary table 1. Single nucleotide polymorphism markers included in the study.
Genetic region	NCBI SNP Reference	Assay ID	Alleles of the SNP	Chr	SNP Type	Location on NCBI assembly	Genotyping method in subgroup 1	Genotyping method in subgroup 2
F11R	rs7546890	C__29722443_10	C/T	1	INTERGENIC/UNKNOWN	160995392	TaqMan OpenArray	TaqMan SNP Assay
	rs6695707	C__26627029_10	A/C	1	INTERGENIC/UNKNOWN	160991821	TaqMan OpenArray
	rs790055	C___9574887_1_	A/G	1	INTRON	160971146	TaqMan OpenArray
	rs11265544	C__42462257_10	A/C	1	INTERGENIC/UNKNOWN	161006019	TaqMan OpenArray
	rs11576837	C__31430600_20	A/G	1	INTERGENIC/UNKNOWN	161003874	TaqMan OpenArray
	rs2516839	C___1839183_10	C/T	1	UTR 5	161013121	TaqMan OpenArray
	rs2073656	C__15949520_10	C/G	1	INTRON	161011355	TaqMan OpenArray
MAGI1	rs17074330	C___2042251_10	A/T	3	INTRON	66008613	TaqMan OpenArray
	rs4688634	C__31686353_10	A/G	3	INTRON	66008310	TaqMan OpenArray
	rs7431819	C__11544289_20	A/G	3	INTRON	65608736	TaqMan OpenArray
	rs1524967	C___8800752_10	C/T	3	INTRON	65608151	TaqMan OpenArray
	rs6788005	C____366602_20	A/T	3	INTRON	65606168	TaqMan OpenArray
	rs9880851	C____366600_10	C/T	3	INTRON	65604551	TaqMan OpenArray
	rs170729951	C__32977791_10	A/T	3	INTRON	65478376	TaqMan OpenArray
	rs6775267	C__29067836_10	C/T	3	INTRON	65476044	TaqMan OpenArray
	rs13082932	C__31031151_10	C/G	3	INTRON	65470481	TaqMan OpenArray
	rs7632998	C____366589_20	A/G	3	INTRON	65463758	TaqMan OpenArray
	rs7614228	C__29067831_10	C/T	3	INTRON	65461535	TaqMan OpenArray
	rs1404549	C__11537089_10	A/G	3	INTRON	65454923	TaqMan OpenArray
	rs12635983	C__11543620_20	A/G	3	INTRON	65432841	TaqMan OpenArray
	rs43229451	C__26038624_10	G/T	3	INTRON	65429357	TaqMan OpenArray
	rs4514994	C__30695725_20	A/T	3	INTRON	65416022	TaqMan OpenArray
	rs98378442	C__29914828_10	G/T	3	INTRON	65414719	TaqMan OpenArray
	rs4467382	C__26129795_10	A/G	3	INTRON	65414051	TaqMan OpenArray
	rs12634802	C__30808546_10	C/T	3	INTRON	65387514	TaqMan OpenArray
	rs13086093	C___1852652_10	C/T	3	INTRON	65383903	TaqMan OpenArray
	rs17417230	C__32641690_10	A/C	3	INTRON	65378211	TaqMan OpenArray
	rs2306379	C__16193656_10	A/G	3	INTRON	65376512	TaqMan OpenArray
	rs12636991	C__11336770_10	A/C	3	INTERGENIC/UNKNOWN	65334140	TaqMan OpenArray
MAGI2	rs13246026	C__31523355_10	A/C	7	INTRON	78331066	TaqMan OpenArray
	rs323149	C___8956703_10	A/T	7	INTRON	78322653	TaqMan OpenArray
	rs77850882	C__29210232_10	A/G	7	INTRON	78321612	TaqMan OpenArray	TaqMan SNP Assay
	rs7803276	C___2806092_10	A/C	7	INTRON	78095872	TaqMan OpenArray	TaqMan SNP Assay
	rs7803705	C___2806087_10	A/G	7	INTRON	78094640	TaqMan OpenArray
	rs21603221	C___2806079_10	C/G	7	INTRON	78091967	TaqMan OpenArray
	rs6962966	C____249092_10	A/G	7	INTRON	77804123	TaqMan OpenArray	TaqMan SNP Assay
MAGI3	rs108579941	C__31476217_10	C/G	1	UTR 5	113933482	TaqMan OpenArray
	rs1342650	C__12071964_10	A/G	1	INTRON	113934304	TaqMan OpenArray
	rs10858004	C__31004582_10	A/G	1	INTRON	114092306	TaqMan OpenArray
	rs6689879	C__26300587_20	C/T	1	INTRON	114101719	TaqMan OpenArray	TaqMan SNP Assay
	rs1343630	C_____64374_10	A/G	1	INTRON	114105855	TaqMan OpenArray
	rs1343629	C_____64375_20	C/G	1	INTRON	114106209	TaqMan OpenArray
	rs10858007	C__11668276_10	A/G	1	INTRON	114119237	TaqMan OpenArray
	rs1343126	C_____48547_10	A/T	1	INTRON	114129092	TaqMan OpenArray	TaqMan SNP Assay
	rs1235000	C_____93957_10	A/G	1	INTRON	114134025	TaqMan OpenArray
	rs48389931	C__29059599_10	A/G	1	INTRON	114135133	TaqMan OpenArray
	rs1217225	C_____93946_10	A/G	1	INTRON	114139991	TaqMan OpenArray
	rs11102660	C__31004303_10	A/G	1	INTRON	114150717	TaqMan OpenArray
	rs3761931	C____440661_10	A/G	1	INTRON	114157023	TaqMan OpenArray
	rs4839331	C__27968998_10	A/G	1	INTRON	114161631	TaqMan OpenArray
	rs1230666	C__11392060_10	A/G	1	INTRON	114173410	TaqMan OpenArray
	rs1230661	C___3002048_10	A/G	1	INTRON	114185590	TaqMan OpenArray
	rs7515189	C__30007004_10	C/T	1	INTRON	114197693	TaqMan OpenArray
	rs12119076	C__31004395_10	A/C	1	INTRON	114210475	TaqMan OpenArray	TaqMan SNP Assay
	rs7522138	C___1329375_10	A/G	1	INTRON	114217705	TaqMan OpenArray
	rs13524	C___1329367_10	A/G	1	UTR 3	114228200	TaqMan OpenArray
PARD3	rs10763976	C___3241023_10	A/G	10	INTRON	34564292	TaqMan OpenArray
PTEN	rs2299939	C__15753523_10	A/C	10	INTRON	89657150	TaqMan OpenArray
	rs1234224	C___9579197_1_	A/G	10	INTRON	89675296	TaqMan OpenArray	TaqMan SNP Assay
	rs12357281	C__30761093_10	C/G	10	INTRON	89700671	TaqMan OpenArray
	rs926091	C___3269697_10	C/T	10	INTRON	89721412	TaqMan OpenArray
TJP1	rs260526	C____814987_10	A/G	15	INTRON	29994474	TaqMan SNP Assay	TaqMan SNP Assay
	rs1679647	C___8717385_10	A/G	15	INTERGENIC/UNKNOWN	29988666	TaqMan SNP Assay
1Single nucleotide polymorphisms excluded due to failed genotyping.
2Absence from Hardy-Weinberg deviation.
