# Supplementary material for: Genetic Variation and Gene Expression Levels of Tight Junction Genes Indicates Relationships Between PTEN as well as MAGI1 and Microscopic Colitis
Source: Springer Nature journal article supplement (doi:10.1007/s10620-017-4857-7), 2017-12-04
Supplement: MOESM2 [file 15277004]

## Sheet: Blad1
Supplementary table 2. Microscopic colitis-phenotypes were investigated by using case-control approach in genetic association studies.
Gene	NCBI SNP Reference	Allele	CC & LC						CC						LC
			P value	OR	Lower CL	Upper CL	Number of controls	Number of cases	P value	OR	Lower CL	Upper CL	Number of controls	Number of cases	P value	OR	Lower CL	Upper CL	Number of controls	Number of cases
F11R	rs7546890	T	0.0901325	1.34209	0.954298	1.88747	406	81	0.0526493	1.51855	0.993041	2.32214	406	50	0.705763	1.10479	0.658467	1.85363	406	31
	rs6695707	C	0.650191	1.12426	0.677529	1.86553	409	87	0.992711	1.00298	0.529629	1.89939	409	55	0.435309	1.34035	0.640578	2.80454	409	32
	rs790055	G	0.0133341	1.8953	1.13447	3.16639	349	80	0.0067563	2.58233	1.27057	5.24839	349	50	0.494832	1.27698	0.631902	2.58058	349	30
	rs11265544	C	0.200238	1.25773	0.885103	1.78724	414	79	0.103242	1.42857	0.928639	2.19764	414	48	0.930994	1.02439	0.593727	1.76744	414	31
	rs11576837	G	0.33751	1.20153	0.825361	1.74914	405	71	0.202169	1.36868	0.843667	2.22041	405	42	0.988675	1.00398	0.579805	1.73849	405	29
	rs2516839	T	0.264306	1.30774	0.815586	2.09688	376	44	0.260422	1.40005	0.777357	2.52155	376	28	0.687147	1.16508	0.553537	2.45224	376	16
	rs2073656	G	0.844426	1.03611	0.727013	1.47661	414	92	0.819162	0.952381	0.626821	1.44703	414	60	0.497085	1.22449	0.681917	2.19877	414	32
MAGI1	rs17074330	T	0.155834	0.625928	0.326027	1.2017	392	70	0.504764	0.772676	0.361459	1.65172	392	42	0.133518	0.415496	0.127295	1.35619	392	28
	rs4688634	G	0.718797	0.940249	0.672331	1.31493	405	86	0.844981	1.04135	0.693732	1.56316	405	54	0.375168	0.787363	0.463737	1.33684	405	32
	rs7431819	G	0.966077	1.00963	0.649276	1.56997	409	72	0.990423	1.00343	0.573815	1.75469	409	42	0.956487	1.0184	0.528938	1.96081	409	30
	rs1524967	T	0.312998	0.782082	0.484727	1.26185	358	38	0.971336	0.989333	0.551191	1.77576	358	24	0.09544	0.509382	0.227389	1.14108	358	14
	rs6788005	T	0.321562	0.827205	0.568265	1.20414	408	84	0.482457	0.849651	0.539034	1.33926	408	54	0.425435	0.788916	0.439865	1.41496	408	30
	rs9880851	T	0.682381	1.08547	0.73281	1.60785	400	83	0.448643	1.21212	0.736486	1.99493	400	51	0.781511	0.921569	0.517364	1.64157	400	32
	rs6775267	T	0.474012	0.890242	0.647503	1.22398	414	101	0.947012	1.01308	0.690619	1.48609	414	63	0.181934	0.710713	0.429623	1.17571	414	38
	rs13082932	G	0.556911	1.12319	0.762171	1.65521	413	97	0.499655	1.17754	0.732352	1.89334	413	62	0.906534	1.03623	0.572033	1.87712	413	35
	rs7632998	G	0.903689	1.02449	0.692273	1.51615	397	60	0.789742	0.935408	0.572551	1.52823	397	37	0.584391	1.18211	0.648711	2.15409	397	23
	rs7614228	T	0.115398	0.69639	0.442993	1.09473	417	75	0.210541	0.699209	0.398352	1.22729	417	46	0.300066	0.691926	0.343582	1.39344	417	29
	rs1404549	G	0.460631	0.882568	0.63325	1.23005	415	92	0.889323	0.971641	0.647938	1.45706	415	59	0.262783	0.747309	0.448197	1.24604	415	33
	rs12635983	G	0.551346	0.887854	0.600236	1.31329	395	63	0.812208	1.06358	0.6396	1.7686	395	37	0.210574	0.696159	0.393871	1.23045	395	26
	rs4514994	T	0.405713	0.846826	0.572075	1.25353	408	70	0.785464	0.935745	0.580034	1.5096	408	43	0.292907	0.715672	0.382721	1.33828	408	27
	rs4467382	G	0.255577	0.830961	0.603715	1.14374	417	92	0.315509	0.820916	0.558174	1.20734	417	59	0.522518	0.849224	0.51438	1.40204	417	33
	rs12634802	T	0.0107065	0.613952	0.421094	0.895138	399	72	0.105315	0.673367	0.416261	1.08927	399	42	0.0253677	0.541621	0.314238	0.93354	399	30
	rs13086093	T	0.0739793	0.739547	0.530769	1.03045	418	98	0.195591	0.768212	0.514875	1.1462	418	63	0.155683	0.691391	0.414429	1.15344	418	35
	rs17417230	C	0.00559011	1.58098	1.1416	2.18948	420	97	0.0150857	1.62841	1.09601	2.41941	420	62	0.114519	1.50131	0.903866	2.49366	420	35
	rs2306379	G	0.150133	0.742678	0.494728	1.1149	415	88	0.40545	0.808737	0.490094	1.33455	415	56	0.154931	0.645791	0.352053	1.18461	415	32
	rs12636991	C	0.765927	0.930135	0.577338	1.49852	406	77	0.799994	0.927273	0.516977	1.6632	406	48	0.857894	0.934905	0.447432	1.95347	406	29
MAGI2	rs13246026	C	0.777376	0.953691	0.68652	1.32484	411	92	0.75102	0.937912	0.631226	1.3936	411	59	0.947325	0.982724	0.586	1.64803	411	33
	rs323149	T	0.0842574	1.43268	0.951069	2.15818	398	71	0.0800051	1.60322	0.941365	2.73042	398	42	0.494199	1.23017	0.678661	2.22984	398	29
	rs7803276	C	0.579104	1.10558	0.77541	1.57633	413	72	0.810645	1.05585	0.676884	1.64698	413	43	0.535819	1.18399	0.693313	2.02195	413	29
	rs7803705	G	0.718098	0.930013	0.627164	1.3791	417	72	0.616274	1.12842	0.703339	1.81039	417	44	0.210302	0.659463	0.342381	1.2702	417	28
	rs6962966	G	0.894261	1.02351	0.726516	1.44193	410	79	0.850682	1.04137	0.682832	1.58816	410	49	0.985373	0.995084	0.587531	1.68534	410	30
MAGI3	rs1342650	G	0.897246	1.03199	0.639893	1.66435	403	62	0.297782	0.743034	0.424084	1.30186	403	36	0.141353	1.89886	0.796994	4.52411	403	26
	rs10858004	G	0.32965	1.22642	0.813202	1.84962	411	76	0.837364	1.05753	0.619906	1.80408	411	45	0.175761	1.4929	0.833055	2.67541	411	31
	rs6689879	T	0.697192	0.932586	0.656135	1.32552	411	93	0.5127	0.869001	0.570612	1.32343	411	59	0.839016	1.05976	0.605331	1.85533	411	34
	rs1343630	G	0.547984	1.13138	0.756202	1.69271	410	68	0.995278	1.00158	0.5944	1.68768	410	40	0.331752	1.33293	0.744813	2.38542	410	28
	rs1343629	G	0.63695	1.07895	0.786937	1.47931	420	98	0.659643	1.08904	0.744991	1.59198	420	63	0.814754	1.06098	0.646617	1.74086	420	35
	rs10858007	G	0.894741	1.03091	0.656706	1.61834	412	64	0.660103	0.876623	0.487289	1.57703	412	39	0.438954	1.29361	0.672959	2.48668	412	25
	rs1343126	T	0.270094	1.25199	0.839252	1.8677	410	66	0.756751	1.08326	0.652994	1.79704	410	41	0.140366	1.56308	0.859603	2.84225	410	25
	rs1235000	G	0.677234	1.08954	0.727501	1.63176	387	60	0.840983	1.05219	0.640108	1.72955	387	38	0.652408	1.15625	0.614441	2.17582	387	22
	rs1217225	G	0.496475	0.897256	0.656417	1.22646	417	97	0.493853	0.876595	0.600981	1.27861	417	62	0.787216	0.935035	0.574084	1.52293	417	35
	rs11102660	G	0.650626	1.09619	0.736608	1.63129	416	86	0.62108	0.878522	0.525542	1.46858	416	54	0.152484	1.51259	0.85518	2.67536	416	32
	rs3761931	G	0.326605	1.191	0.839693	1.68928	418	99	0.196444	1.32731	0.862831	2.04182	418	64	0.969821	0.989779	0.581276	1.68536	418	35
	rs4839331	G	0.945033	1.0178	0.61643	1.6805	417	75	0.585561	1.18284	0.646443	2.16434	417	44	0.579948	0.795731	0.35371	1.79013	417	31
	rs1230666	G	0.571859	0.866962	0.52832	1.42267	420	80	0.205862	0.691057	0.388742	1.22847	420	48	0.510477	1.33604	0.56218	3.17516	420	32
	rs1230661	G	0.741608	0.933232	0.618836	1.40736	417	79	0.500098	0.842845	0.512534	1.38603	417	48	0.760824	1.10647	0.576641	2.12313	417	31
	rs7515189	T	0.299432	1.22222	0.836277	1.78628	400	94	0.897306	0.968421	0.59488	1.57652	400	59	0.0480941	1.71429	0.999242	2.941	400	35
	rs12119076	C	0.11106	1.33663	0.934697	1.91141	406	88	0.522123	1.15573	0.741758	1.80073	406	56	0.0511844	1.69404	0.992327	2.89195	406	32
	rs7522138	G	0.900013	0.977397	0.684197	1.39624	410	71	0.794178	0.94196	0.601073	1.47618	410	42	0.910168	1.03121	0.604646	1.75869	410	29
	rs13524	G	0.902477	1.02552	0.685332	1.53456	407	61	0.897357	1.03368	0.62485	1.71002	407	37	0.967277	1.01301	0.546237	1.87866	407	24
PARD3	rs10763976	G	0.415223	0.877266	0.640138	1.20223	400	96	0.571039	0.895735	0.611903	1.31122	400	61	0.502047	0.845972	0.51887	1.37928	400	35
PTEN	rs2299939	C	0.242625	1.32238	0.826564	2.11561	404	72	0.150418	1.58685	0.841598	2.99205	404	42	0.866207	1.0579	0.549574	2.03641	404	30
	rs1234224	G	0.00125165	1.69507	1.22769	2.34038	410	93	0.00278462	1.78623	1.21701	2.62169	410	61	0.101648	1.53301	0.91628	2.56485	410	32
	rs12357281	G	0.585471	1.20103	0.621317	2.32166	408	68	0.679276	0.857272	0.412843	1.78013	408	41	0.14929	2.74797	0.656658	11.4996	408	27
	rs926091	T	0.197021	1.37327	0.846782	2.22709	415	73	0.023086	1.86809	1.08172	3.22613	415	45	0.427094	0.684389	0.267023	1.75411	415	28
TJP1	rs260526	G	0.956249	0.985289	0.580251	1.67306	405	104	0.521111	0.820702	0.448418	1.50206	405	65	0.4381	1.44613	0.566361	3.69252	405	39
	rs1679647	G	0.700882	1.10073	0.674455	1.79641	404	104	0.629059	1.15483	0.643682	2.07186	404	65	0.975969	1.01185	0.47024	2.17726	404	39
